# Supplementary material
Source: publisher figshare collection journal article supplement (https://acs.figshare.com/ndownloader/files/9831208)
Supplement: Supplementary file 1 [file 9831208]

## Sheet: Feuil1
Supplemental file 3. Peptide sequences of CLU, ESLPBP1, SERPINE2, and DNASE1L3 used for MRM analysis
Accession number	Protein name	Gene name	Peptide sequence	Q1 (charge)	Q3 (charge)
P17697	Clusterin	CLU	LLLSSLEEAK	551.8 (+2)	676,4 (y6, +)	763,4 (y7, +)	876,5 (y8, +)
			LLLSSLEEAK[13C6,15N2]	555.8 (+2)	684,4 (y6, +)	771,4 (y7, +)	884,5 (y8, +)
			GSLFFNPK	455,2 (+2)	505,3 (y4, +)	652,3 (y5, +)	765,4 (y6, +)
			GSLFFNPK[13C6,15N2]	459,2 (+2)	513,3 (y4, +)	660,3 (y5, +)	773,4 (y6, +)
E1B9P4	Uncharacterized protein	ELSPBP1	ANSLSPWC[CAM]STR	639,8 (+2)	806,4 (y6, +)	893,4 (y7, +)	1093,5 (y9, +)
			ANSLSPWC[CAM]STR[13C6,15N4]	644,8 (+2)	816,4 (y6, +)	903,4 (y7, +)	1103,5 (y9, +)
			QWC[CAM]SVTSSFDEK	737,3 (+2)	813,4 (y7, +)	999,5 (y9, +)	1159,5 (y10, +)
			QWC[CAM]SVTSSFDEK[13C6,15N2]	741,3 (+2)	821,4 (y7, +2)	1007,5 (y9, +2)	1167,5 (y10, +2)
F1MZX2	Uncharacterized protein	SERPINE2	LVLVNAVYFK	583,4 (+2)	741,4 (y6, +2)	840,5 (y7, +2)	953,5 (y8, +2)
			LVLVNAVYFK[13C6,15N2]	587,4 (+2)	749,4 (y6, +2)	848,5 (y7, +2)	961,6 (y8, +2)
			ASAATTAILIAR	579,8 (+2)	585,4 (y5, +2)	656,4 (y6, +2)	858,5 (y8, +2)
			ASAATTAILIAR[13C6,15N4]	584,8 (+2)	595,4 (y5, +2)	666,5 (y6, +2)	868,5 (y8, +2)
F1MGQ1	Uncharacterized protein	DNASE1L3	IC[CAM]SFNVR	448,2 (+2)	388,2 (y3, +2)	535,3 (y4, +2)	622,3 (y5, +2)
			IC[CAM]SFNVR[13C6,15N4]	453,2 (+2)	398,2 (y3, +2)	545,3 (y4, +2)	632,3 (y5, +2)
